# Supplementary material for: Gregarine single-cell transcriptomics reveals differential mitochondrial remodeling and adaptation in apicomplexans
Source: PubMed Central journal article supplement (PMC8051059; doi:10.1186/s12915-021-01007-2), 2021-04-16
Supplement: 12915_2021_1007_MOESM14_ESM.pdf [file 12915_2021_1007_MOESM14_ESM.pdf]

# Boxplots of Outlier Genes

Dataset A

Dataset B

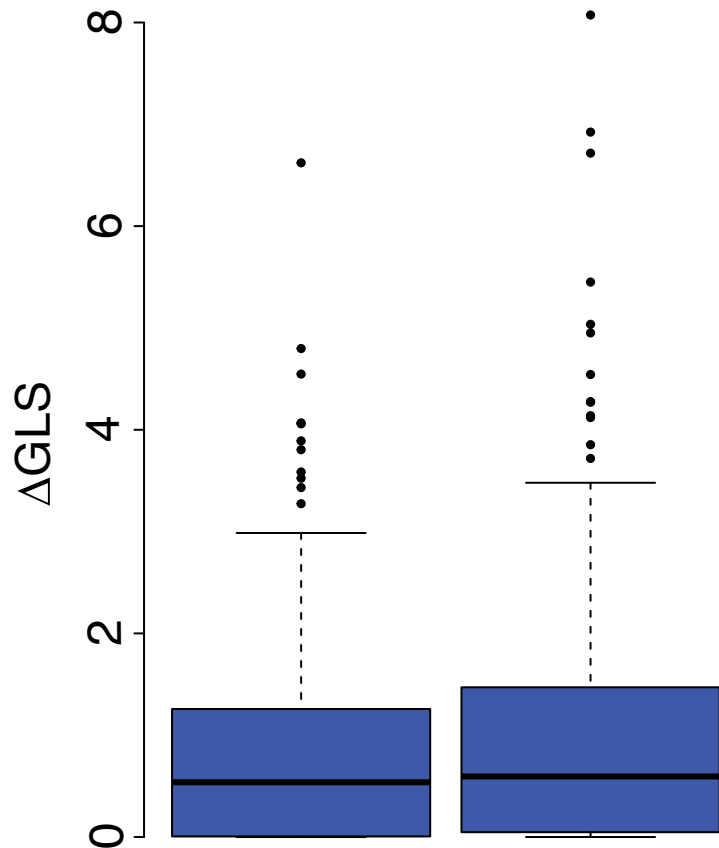

## Datasets A Outlier Genes

| GENE       | $\Delta GLS$ | Best Topology |
|------------|--------------|---------------|
| tcp1-gamma | 6.62193333   | A+C           |
| gpn3       | 4.79786667   | G+C           |
| tcp1-eta   | 4.54706667   | A+C           |
| crfg       | 4.06766667   | G+C           |
| psmc5      | 4.0582       | A+G           |
| tubg       | 3.89093333   | A+C           |
| dimt1l     | 3.80406667   | G+C           |
| tcp1-beta  | 3.5854       | A+G           |
| gdi2       | 3.52386667   | A+C           |
| eif6       | 3.43253333   | G+C           |
| mcm4       | 3.27373333   | A+G           |
| psmd1      | 2.98626667   | G+C           |

## Datasets B Outlier Genes

| GENE         | $\Delta GLS$ | Best Topology |
|--------------|--------------|---------------|
| XP_002897020 | 8.0736       | A+C           |
| XP_002904235 | 6.9236       | G+C           |
| XP_002903638 | 6.717        | G+C           |
| XP_002906256 | 5.4506       | G+C           |
| XP_002903063 | 5.035733333  | A+G           |
| XP_0029062   | 4.951466667  | A+C           |
| XP_0029960   | 4.542533333  | G+C           |
| XP_0028992   | 4.275733333  | A+C           |
| XP_0027722   | 4.270466667  | G+C           |
| XP_002895552 | 4.1382       | G+C           |
| XP_0029092   | 4.119866667  | A+G           |
| XP_002997686 | 3.853266667  | A+G           |
| XP_0029053   | 3.7186       | A+G           |
